# Supplementary material
Source: HighWire-hosted journal article supplement (http://www.ajnr.org/highwire/filestream/68478/field_highwire_adjunct_files/0/19-00371.pdf)
Supplement: 19-00371.pdf [file 19-00371.pdf]

**On-line Table: Descriptions of recurrent AVMs**

| Case No. | Sex | Age (yr) | Presentation | SM Grade | Compact/Diffuse | Deep Drainage | Treatment Type | Residual on TOF-MRA | Residual on CEMRI | MRI Description of Recurrence                                                         | Re-Treatment |
|----------|-----|----------|--------------|----------|-----------------|---------------|----------------|---------------------|-------------------|---------------------------------------------------------------------------------------|--------------|
| 2        | F   | 7        | Hemorrhage   | II       | C               | Yes           | Embolization   | Yes                 | Yes               | Tuft of vessels on TOF-MRA and CEMRI                                                  | Radiosurgery |
| 3        | M   | 16       | Hemorrhage   | II       | C               | No            | Embolization   | No                  | No                | NA                                                                                    | Surgery      |
| 7        | M   | 8        | Hemorrhage   | I        | C               | No            | Embolization   | Yes                 | Yes               | Tuft of vessels along cavity wall on TOF-MRA, nodular juxtamural enhancement on CEMRI | Surgery      |
| 8        | F   | 12       | Hemorrhage   | II       | C               | No            | Embolization   | No                  | No                | NA                                                                                    | Surgery      |
| 11       | F   | 12       | Hemorrhage   | II       | C               | Yes           | Embolization   | Yes                 | Yes               | Tuft of vessels on TOF-MRA and CEMRI, prominent draining vein on CEMRI                | Surgery      |
| 13       | F   | 12       | Hemorrhage   | I        | C               | No            | Embolization   | Yes                 | Yes               | Tuft of vessels along cavity wall on TOF-MRA, nodular juxtamural enhancement on CEMRI | Surgery      |
| 20       | F   | 15       | Seizures     | I        | C               | No            | Surgery        | Yes                 | Yes               | Tuft of vessels on TOF-MRA and CEMRI                                                  | Surgery      |
| 22       | M   | 8        | Hemorrhage   | II       | D               | No            | Surgery        | No                  | Yes               | Linear enhancement                                                                    | Surgery      |
| 23       | M   | 8        | Hemorrhage   | II       | D               | No            | Surgery        | No                  | Yes               | Linear enhancement                                                                    | Embolization |
| 27       | M   | 5        | Hemorrhage   | I        | C               | No            | Surgery        | Yes                 | Yes               | Tuft of vessels on TOF-MRA and CEMRI                                                  | Surgery      |
| 32       | F   | 10       | Hemorrhage   | I        | C               | No            | Embolization   | No                  | Yes               | Nodular juxtamural enhancement, prominent draining vein                               | Radiosurgery |
| 35       | M   | 8        | Hemorrhage   | III      | C               | Yes           | Embolization   | NA <sup>a</sup>     | Yes               | Enhancing vessels within resection cavity with prominent draining vein                | Radiosurgery |
| 36       | M   | 14       | Hemorrhage   | II       | D               | Yes           | Surgery        | No                  | Yes               | Nodular juxtamural enhancement on CEMRI                                               | Radiosurgery |

**Note:**—C indicates compact; D, diffuse; NA, not applicable.

<sup>a</sup> TOF-MRA performed after contrast and not evaluated for recurrence.
